# Supplementary material for: Influence of synthesis conditions on the surface passivation and electrochemical behavior of layered cathode materials
Source: Royal Society of Chemistry journal article supplement (doi:10.1039/c4ta04497e), 2014-01-01
Supplement: c4ta04497e1.pdf [file c4ta04497e1.pdf]

*Supplemental Information for*

**Influence of Synthesis Conditions on the Surface Passivation and  
Electrochemical Behavior of Layered Cathode Materials**

Feng Lin,<sup>1,\*</sup> Dennis Nordlund,<sup>2</sup> Taijun Pan,<sup>1,3</sup> Isaac M. Markus,<sup>1,4</sup> Tsu-Chien Weng,<sup>2</sup>  
Huolin L. Xin<sup>5,\*</sup> & Marca M. Doeffl<sup>1,\*</sup>

1. Environmental Energy Technologies Division, Lawrence Berkeley National Laboratory, Berkeley, CA 94720, USA
2. Stanford Synchrotron Radiation Lightsource, SLAC National Accelerator Laboratory, Menlo Park, CA 94025, USA
3. School of Materials Science and Engineering, Changzhou University, Changzhou 213164, China
4. Department of Materials Science and Engineering, University of California, Berkeley 94720, USA
5. Center for Functional Nanomaterials, Brookhaven National Laboratory, Upton, NY 11973, USA

Corresponding authors: F.L. [flin@lbl.gov](mailto:flin@lbl.gov); H.L.X. [hxin@bnl.gov](mailto:hxin@bnl.gov); M.M.D. [mmdoeff@lbl.gov](mailto:mmdoeff@lbl.gov)

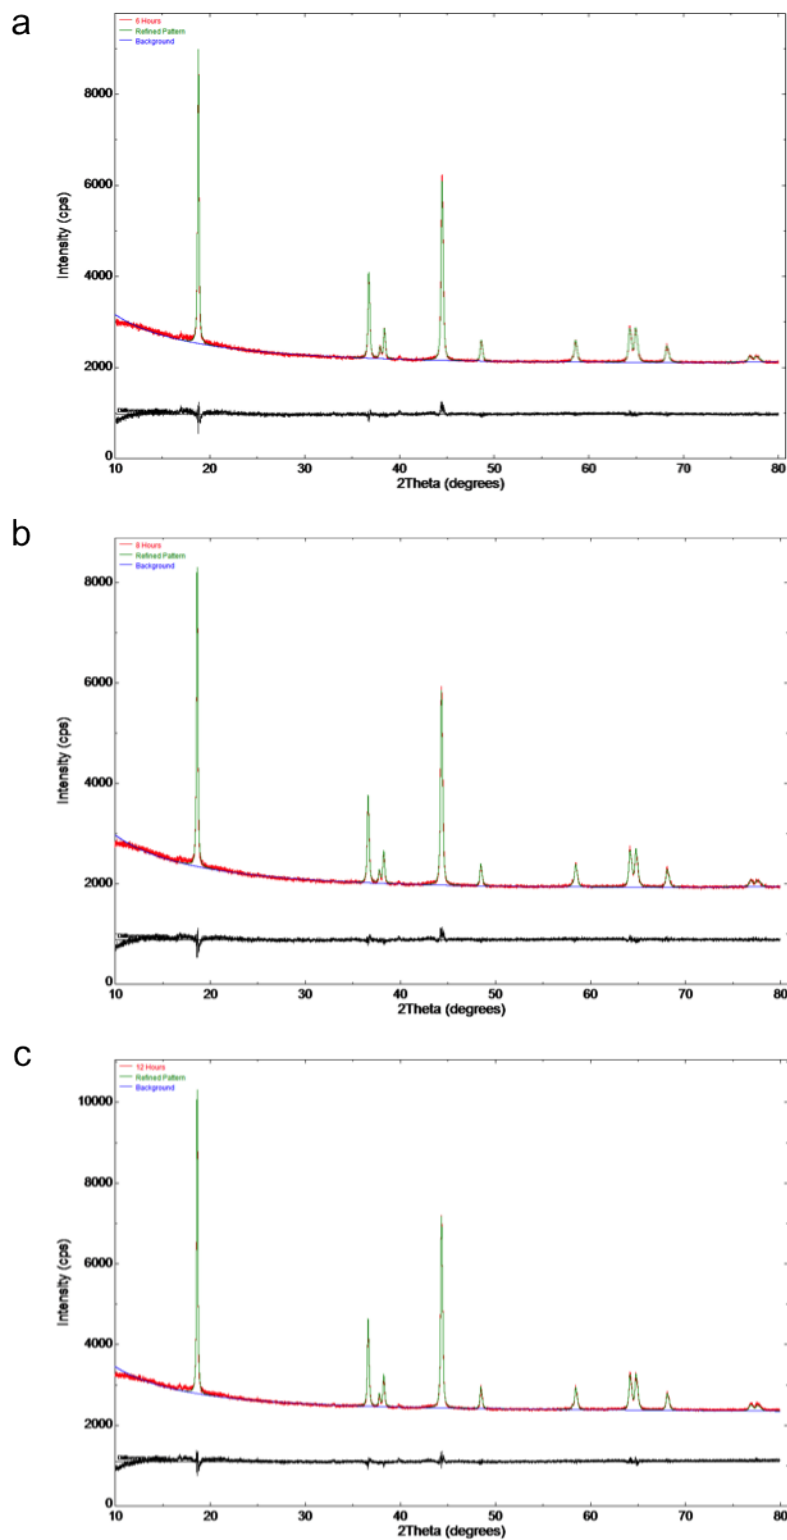

**Figure S1.** XRD patterns with Rietveld refinement for NMC442-2%Ti materials prepared with different annealing durations at 900 °C: 6 hours (a), 8 hours (b) and 12 hours (c).

**Table S1.** Lattice parameters for NMC442-2%Ti materials.

| Samples  | TM/Li Intermixing | a (Å)  | b (Å)  | c (Å)   | V (Å <sup>3</sup> ) |
|----------|-------------------|--------|--------|---------|---------------------|
| 6 hours  | ~ 4.5%            | 2.8746 | 2.8746 | 14.2699 | 102.122             |
| 8 hours  | ~ 4.5%            | 2.8756 | 2.8756 | 14.2760 | 102.239             |
| 12 hours | ~ 5.0%            | 2.8753 | 2.8753 | 14.2756 | 102.215             |

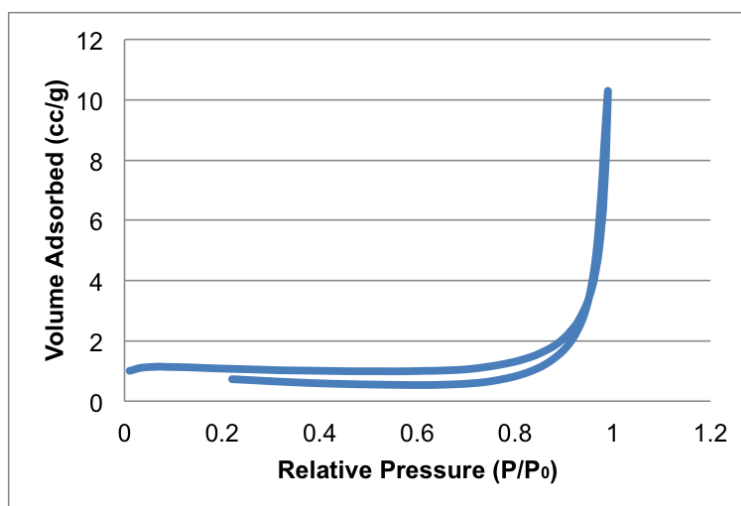

**Figure S2.** N<sub>2</sub> adsorption and desorption isotherms example for NMC442-2%Ti materials prepared at 900 °C for 12 hours.
